# Supplementary material
Source: PubMed Central journal article supplement (PMC4084668)

**ARHGEF16**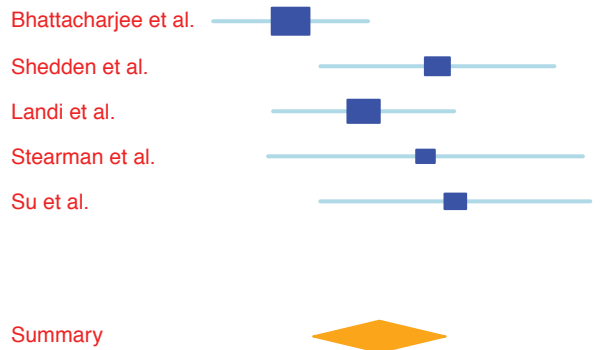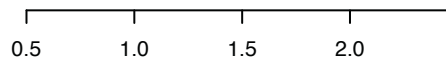

Standardized Mean Difference (log2 scale)

**BLNK**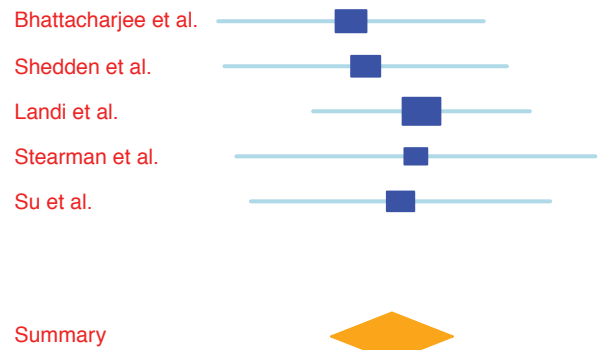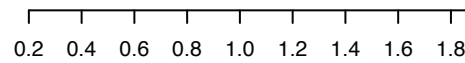

Standardized Mean Difference (log2 scale)

**CACNB3**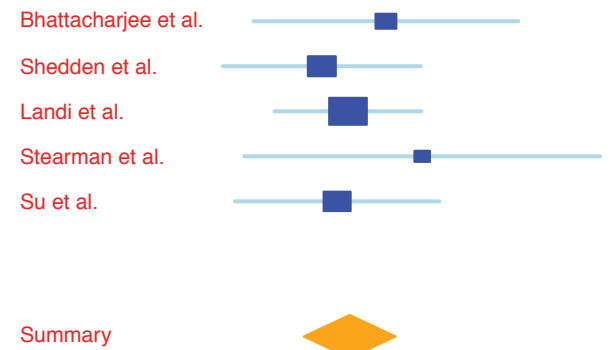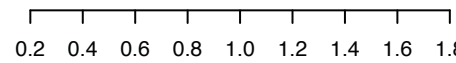

Standardized Mean Difference (log2 scale)

**COL5A2**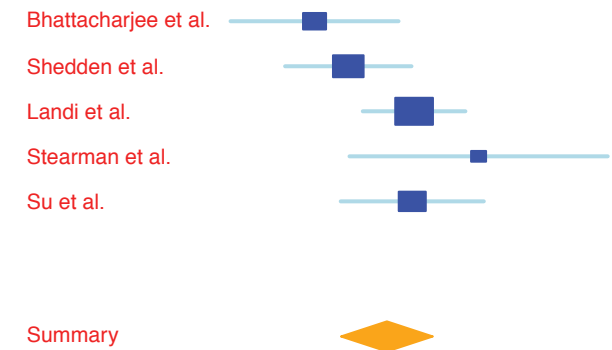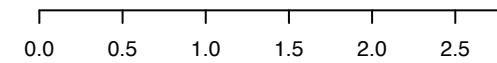

Standardized Mean Difference (log2 scale)

**EPHB2**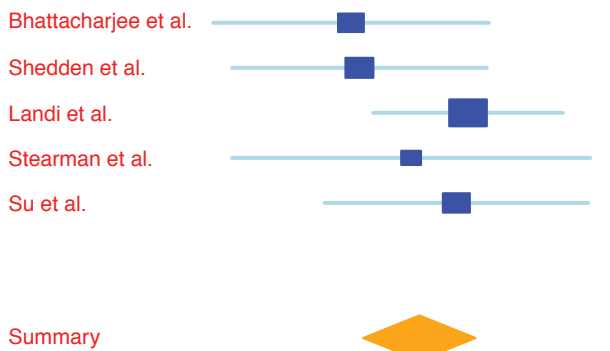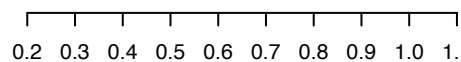

Standardized Mean Difference (log2 scale)

**KCNK1**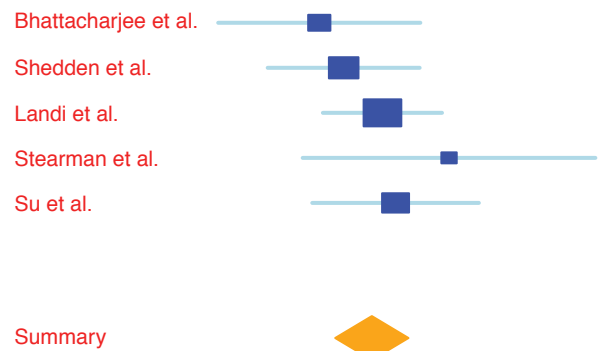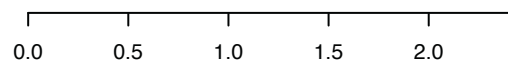

Standardized Mean Difference (log2 scale)

**MPZL1**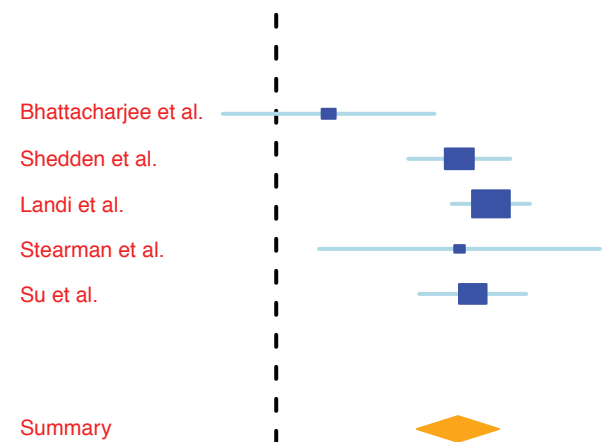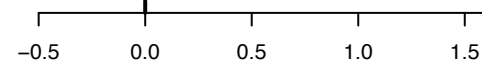

Standardized Mean Difference (log2 scale)

**PTK7**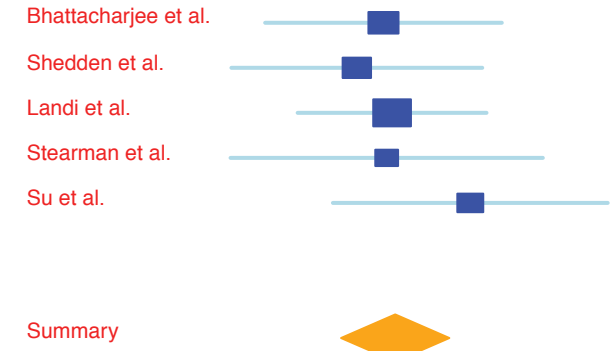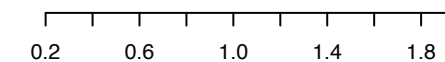

Standardized Mean Difference (log2 scale)

**RUNX1**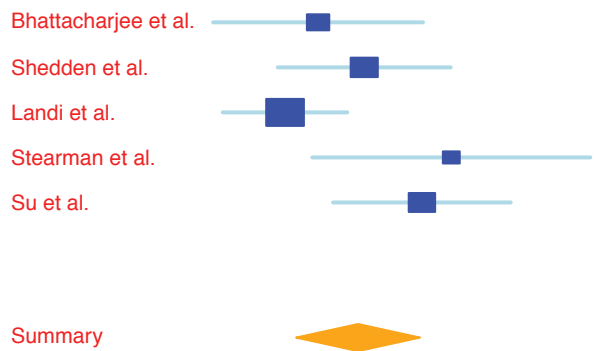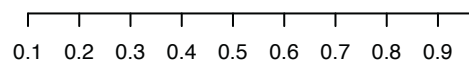

Standardized Mean Difference (log2 scale)

**SLC2A5**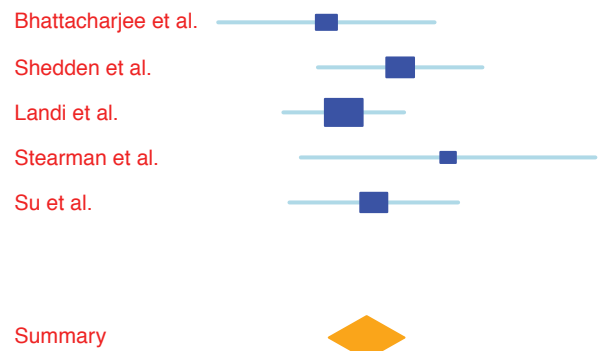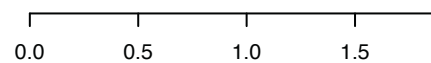

Standardized Mean Difference (log2 scale)

**SULT1C2**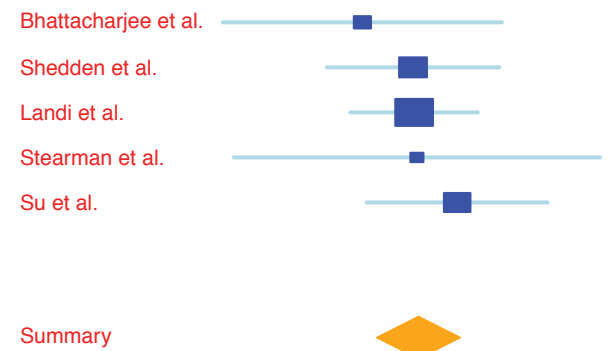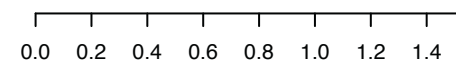

Standardized Mean Difference (log2 scale)

**ARHGEF16****BLNK****CACNB3****COL5A2**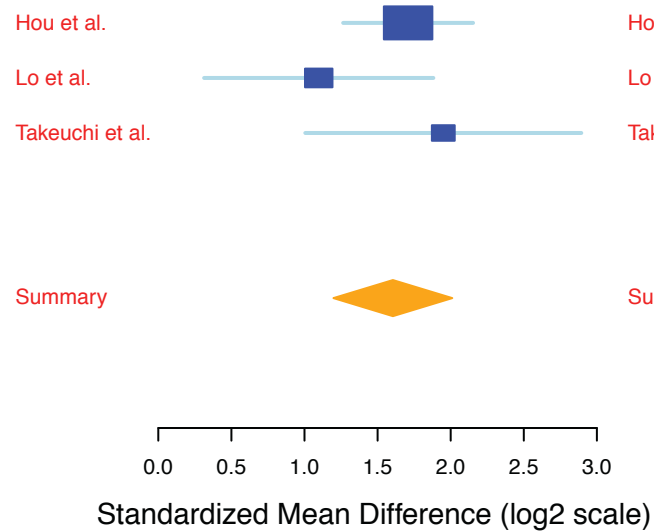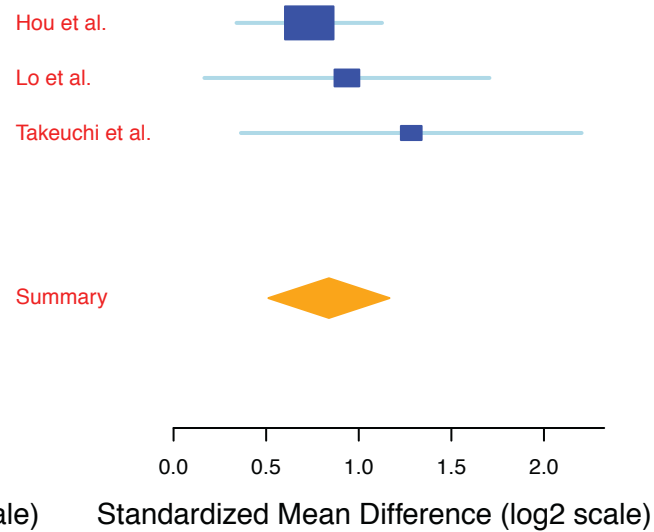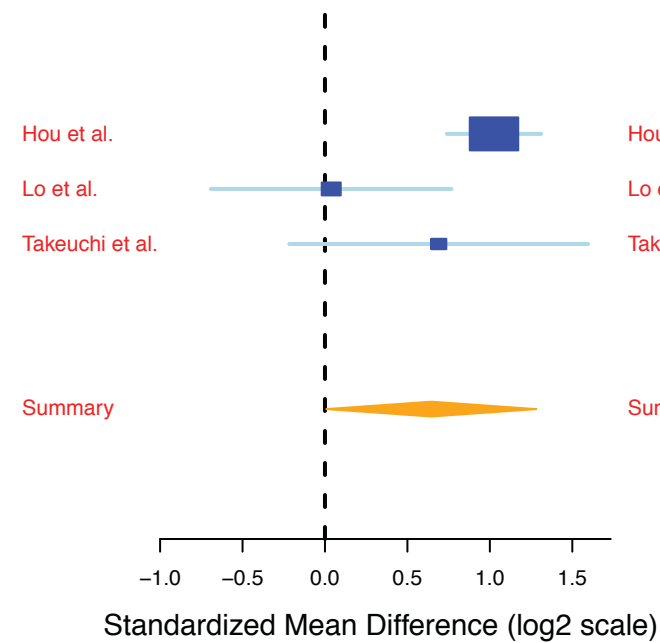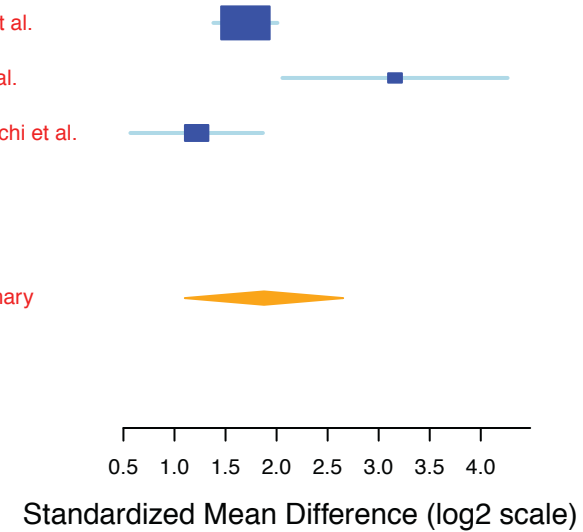**EPHB2****KCNK1****MPZL1****PTK7**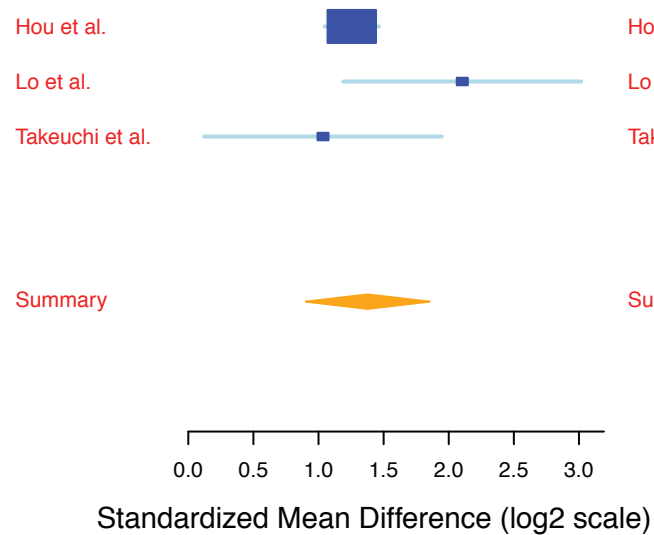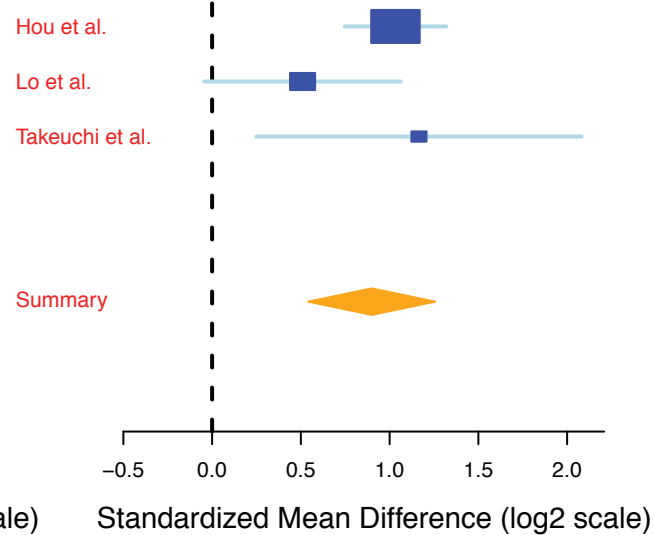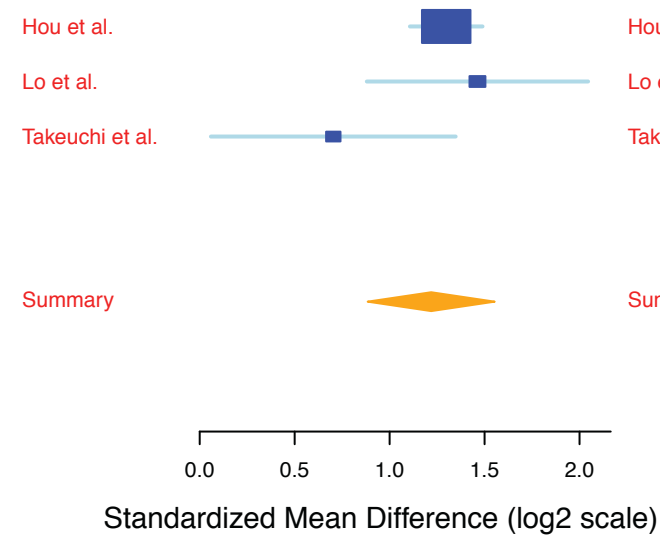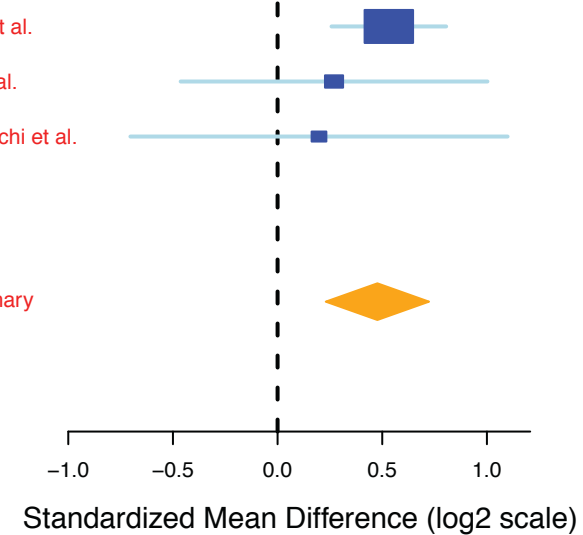**RUNX1****SLC2A5****SULT1C2**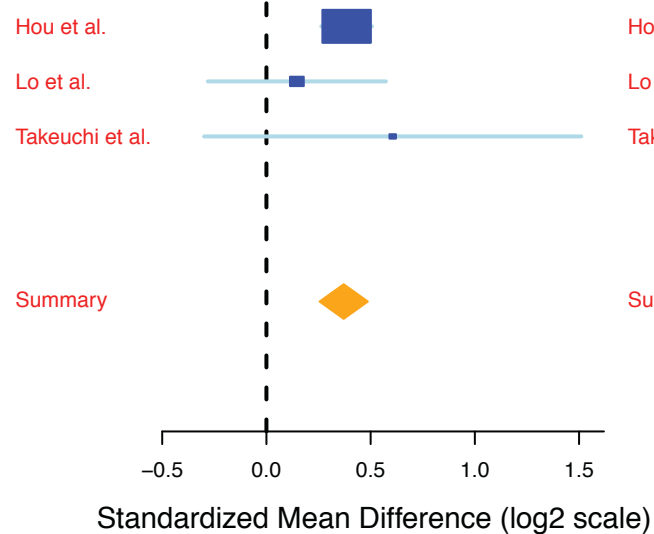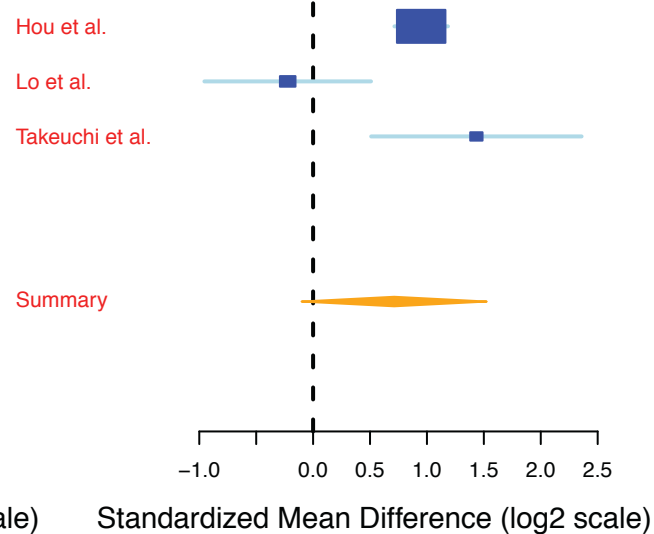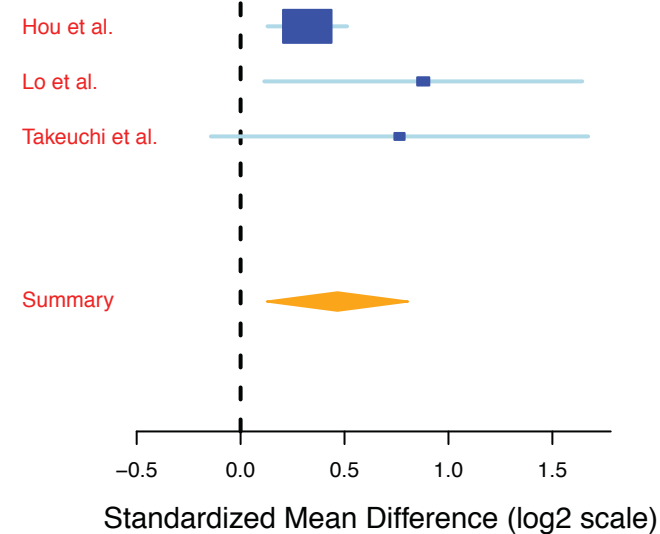

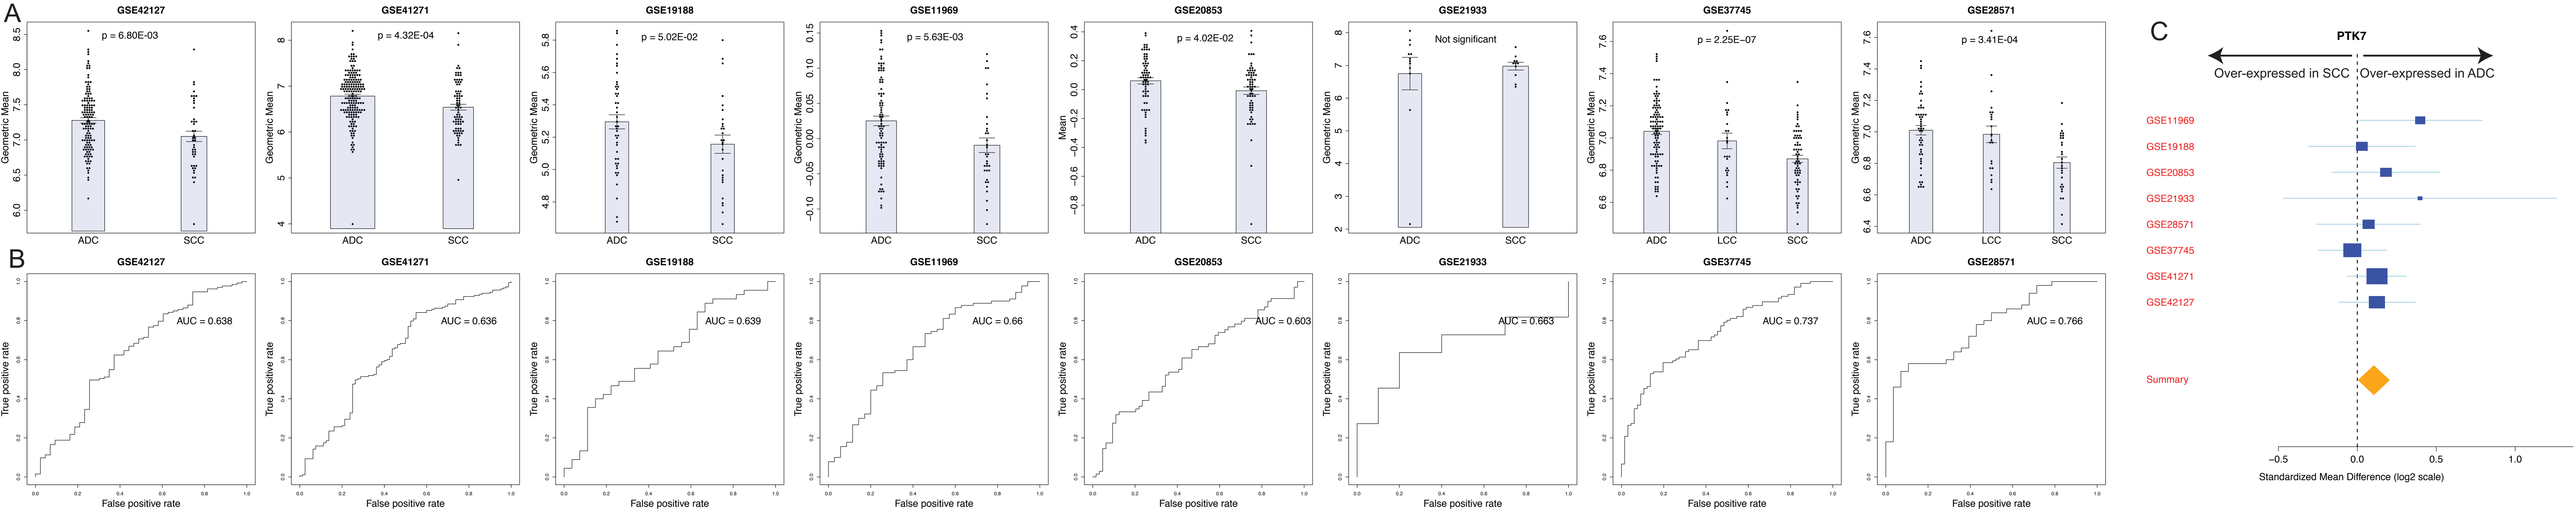

**A**

ADC

1

2

3

4

5

6

7

8

9

10

A

B

Normal

C4

C8

C10

D2

D4

D6

D7

D10

**B**

Normalized Ptk7 expression

2.5  
2.0  
1.5  
1.0  
0.5  
0.0

wild-type

KrasLSL

**C**

wild-type lung

AAH

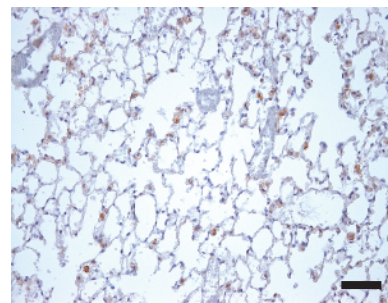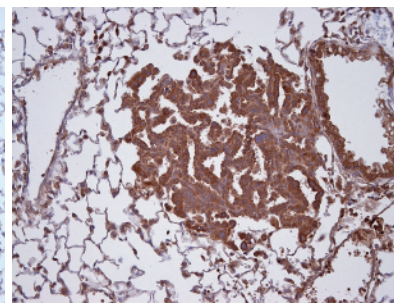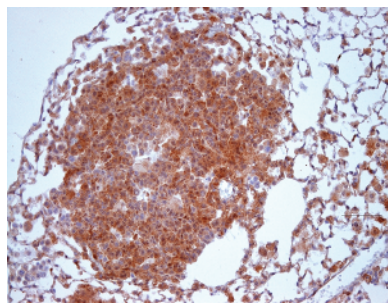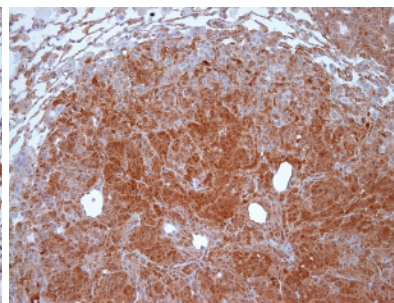

Adenoma

Adenocarcinoma

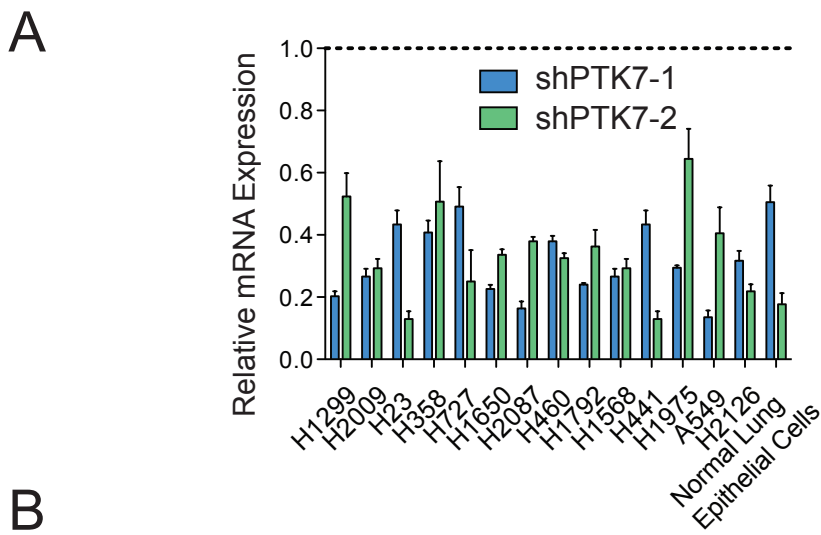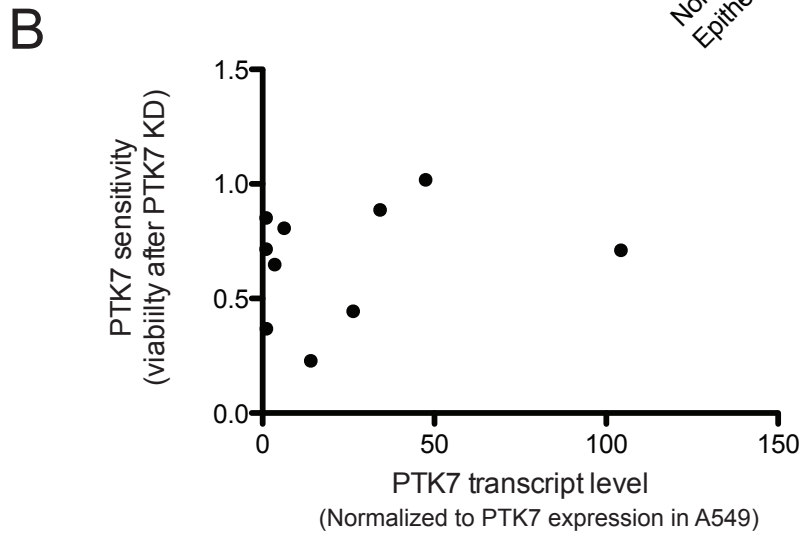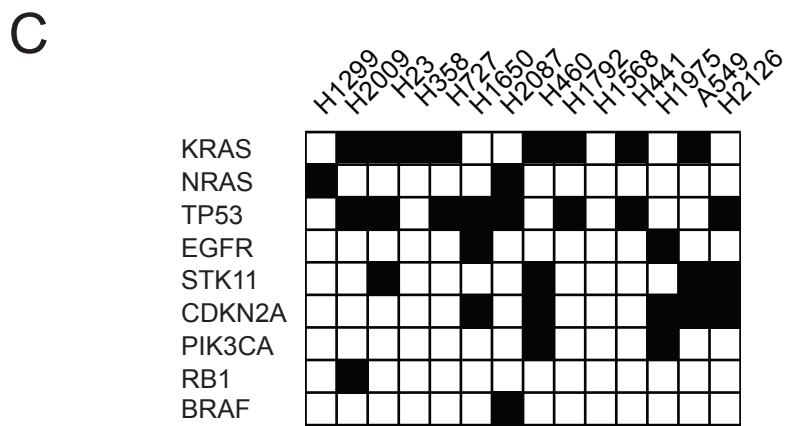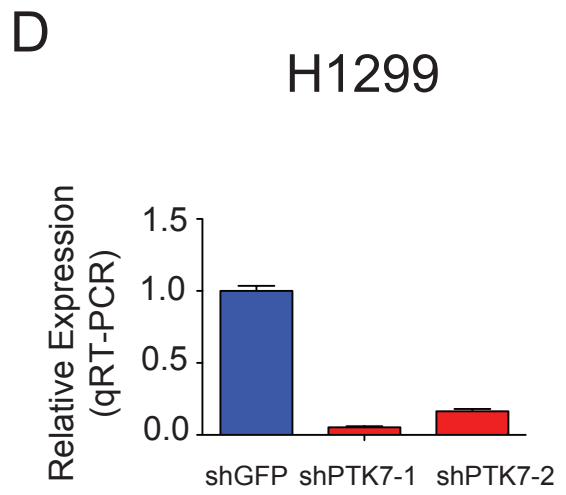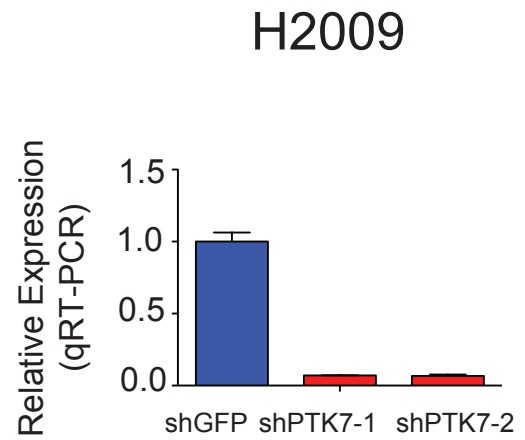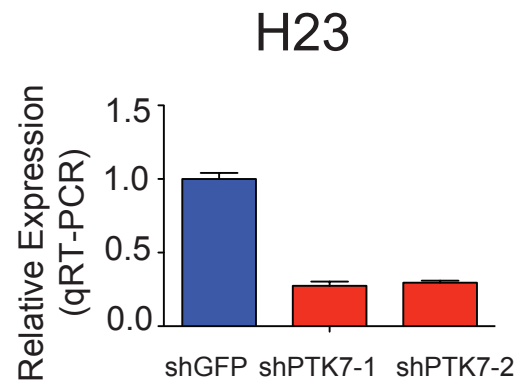

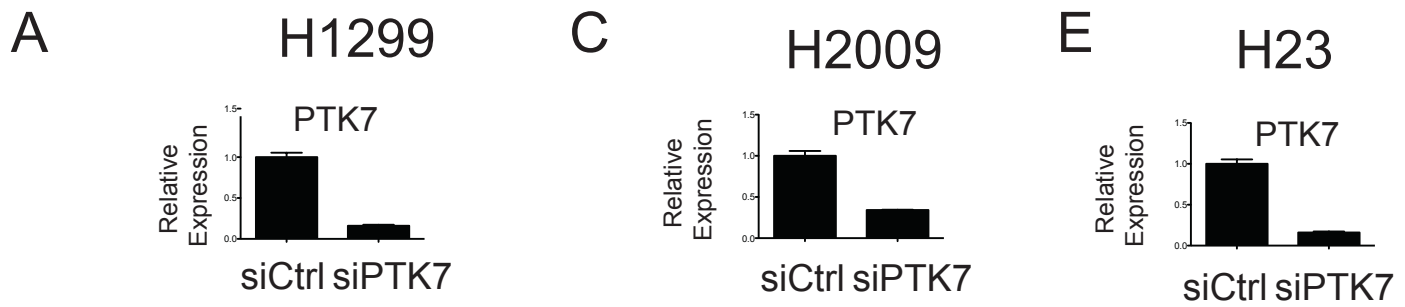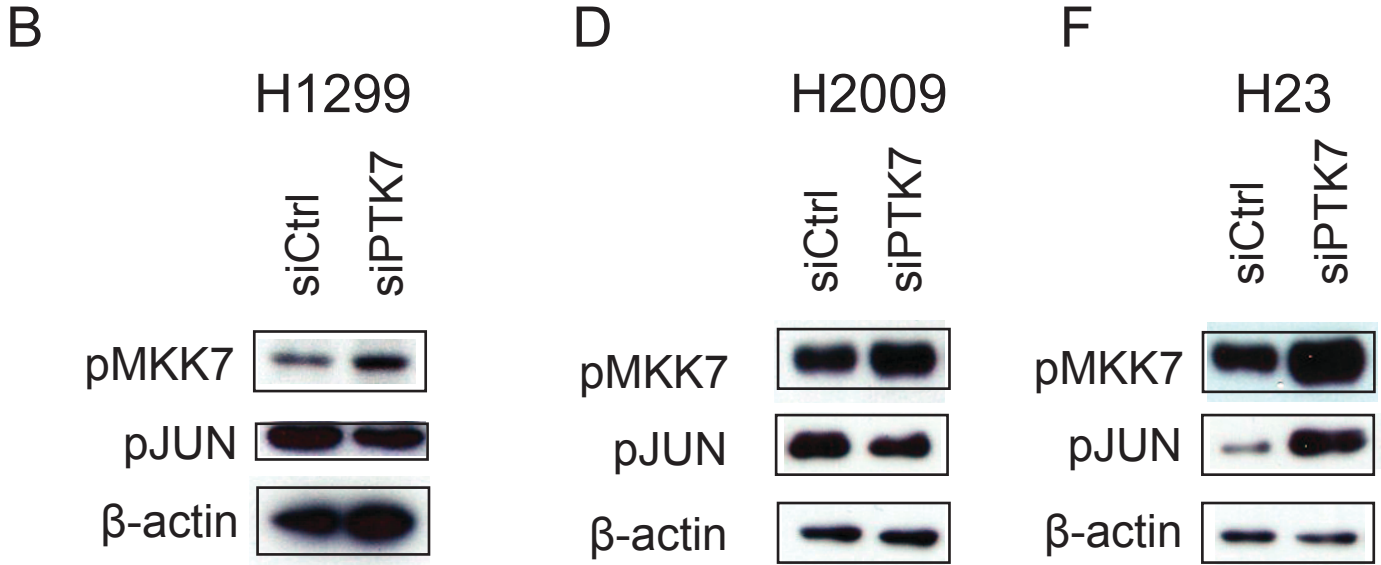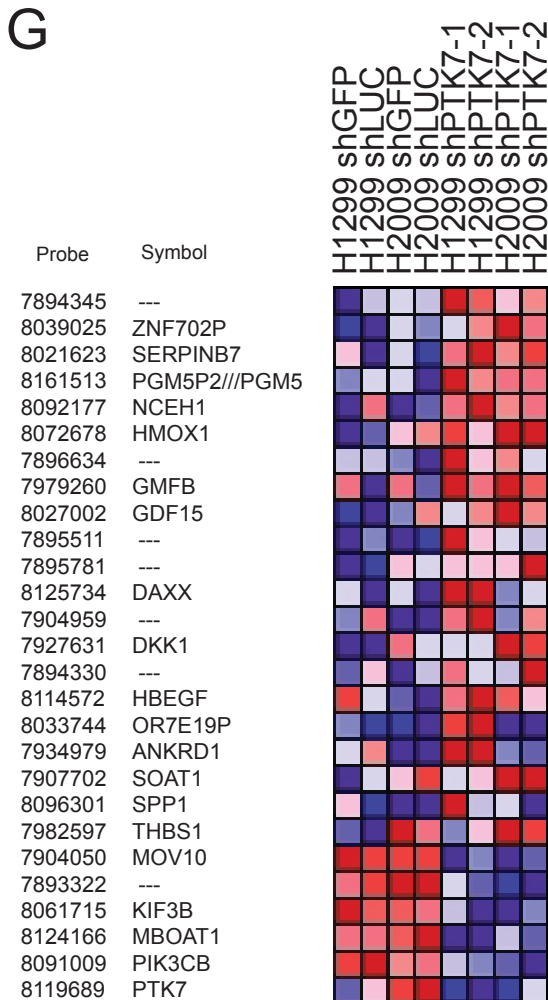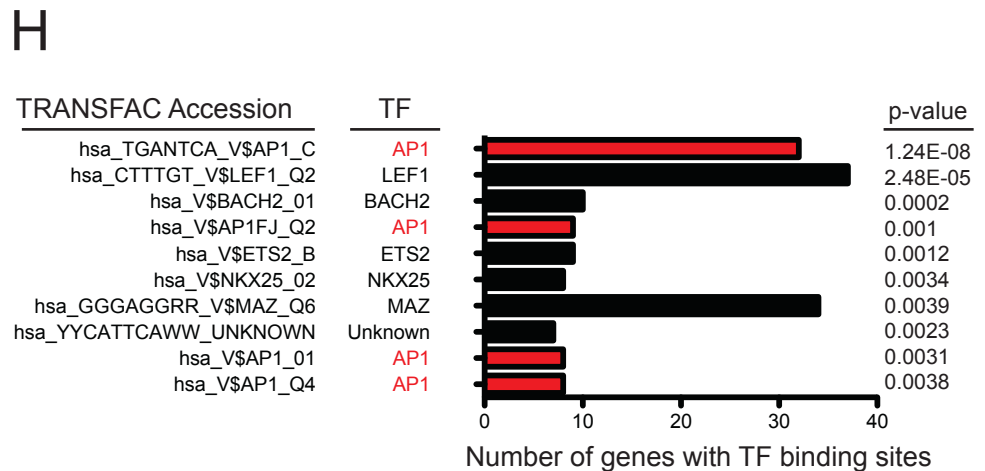

Supplement: NIHMS576031-supplement-2.pdf [file NIHMS576031-supplement-2.pdf]
